# Supplementary material for: Development of an evidence-based brief ‘talking’ intervention for non-responders to bowel screening for use in primary care: stakeholder interviews
Source: Springer Nature journal article supplement (doi:10.1186/s12875-018-0794-6), 2018-06-30

## Intervention

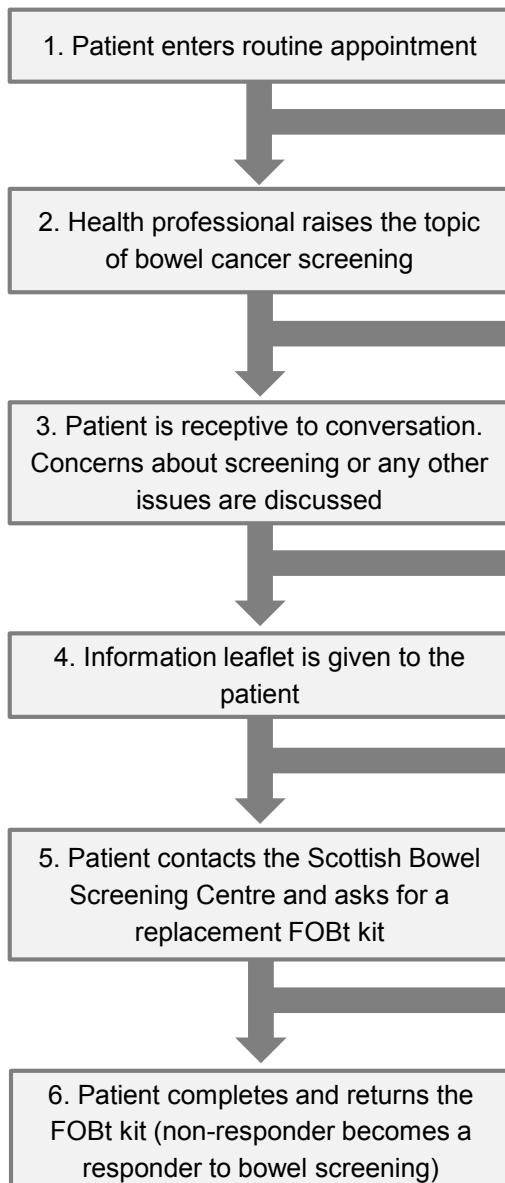

## Potential bottlenecks

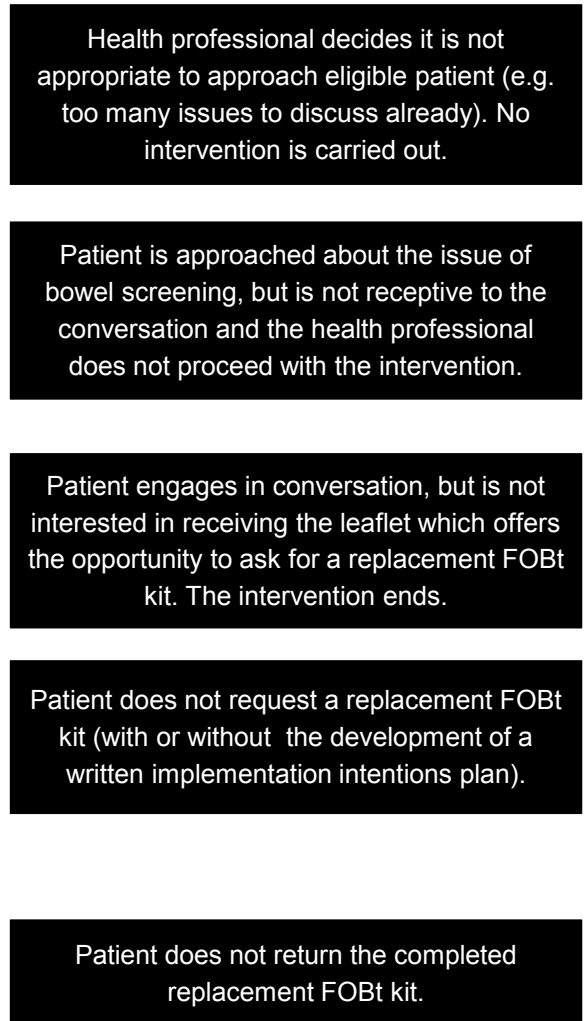

Supplement: MOESM1 [file 15897192]
